# Supplementary material
Source: PubMed Central journal article supplement (PMC6059374)
Supplement: NIHMS974906-supplement.pdf [file NIHMS974906-supplement.pdf]

**Supplementary Figure.** Study cohort inclusion diagram. Abbreviation: EMR, Electronic Medical Record.

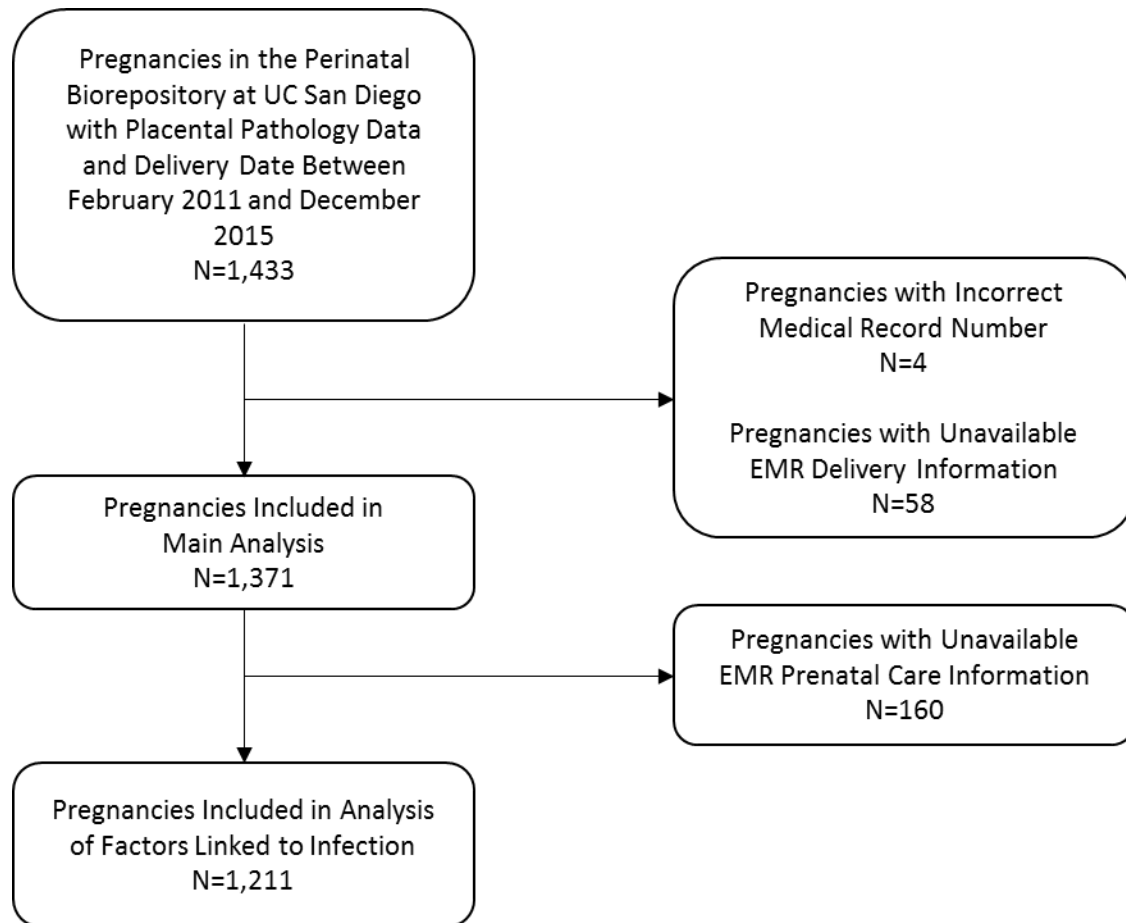

**Supplementary Table 1.** Selected characteristics by preterm birth with and without premature rupture of membranes (PROM), N=1371.

| <b>Characteristic</b>                          | <b>No Preterm Birth<br/>n=1,082</b> | <b>Preterm Birth<br/>without PROM<br/>n=235</b> | <b>Preterm Birth<br/>with PROM<br/>n=54</b> |
|------------------------------------------------|-------------------------------------|-------------------------------------------------|---------------------------------------------|
| Hypertension or Preeclampsia, n (%)            | 322 (29.8)                          | 167 (71.1)                                      | 7 (13.0)                                    |
| Diabetes or Gestational Diabetes, n (%)        | 361 (33.4)                          | 108 (46.0)                                      | 21 (38.9)                                   |
| Cesarean Delivery, n (%)                       | 495 (45.7)                          | 147 (62.6)                                      | 26 (48.1)                                   |
| Gestational Age at Delivery, median (IQ Range) | 39.2 (1.6)                          | 34.4 (5.4)                                      | 33.2 (4.8)                                  |

Abbreviation: IQ, interquartile.
